# Supplementary material for: Fabrication of doxorubicin-gated mesoporous polydopamine nanoplatforms for multimode imaging-guided synergistic chemophotothermal therapy of tumors
Source: Drug Deliv. 2020 Feb 24;27(1):367–77. doi: 10.1080/10717544.2020.1730523 (PMC7054968; doi:10.1080/10717544.2020.1730523)
Supplement: Supplemental Material [file IDRD_A_1730523_SM8253.docx]

**Supporting Information**

**Fabrication of doxorubicin-gated mesoporous polydopamine nanoplatforms for multimode imaging-guided synergistic chemophotothermal therapy of tumors**

Min Yang,1 Ningnan Zhang,1 Tao Zhang,2 Xian Yin,1 Jie Shen1,*

1Department of Urology, The First People’s Hospital of Yunnan Province, Kunming University of Science and Technology, Kunming, 650032, P. R. China

2School of Chemical Science and Technology, Yunnan University, Kunming, 650091, P. R. China

*Corresponding authors. Email: Sjkmyf2435@163.com

**
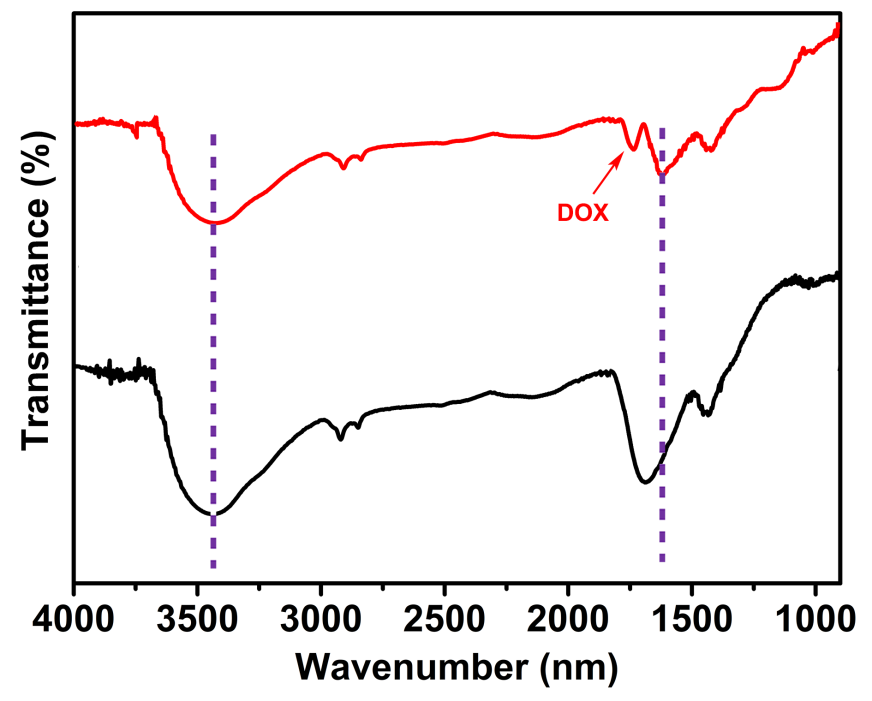
**

**Figure S1.** Fourier transform infrared (FT-IR) spectra of MPDA (black line) and MPDA-DOX NPs (red line).

**
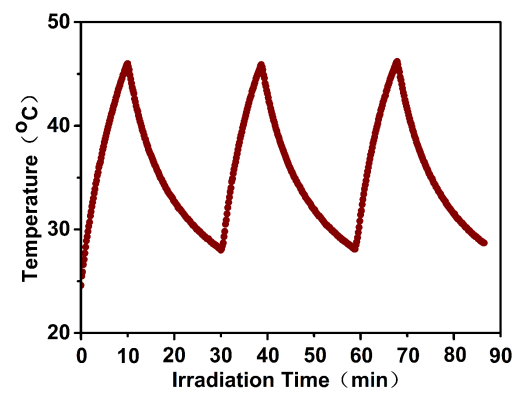
**

**Figure S2.** Photostability tests of MPDA NPs for three cycles of NIR laser irradiation.

**
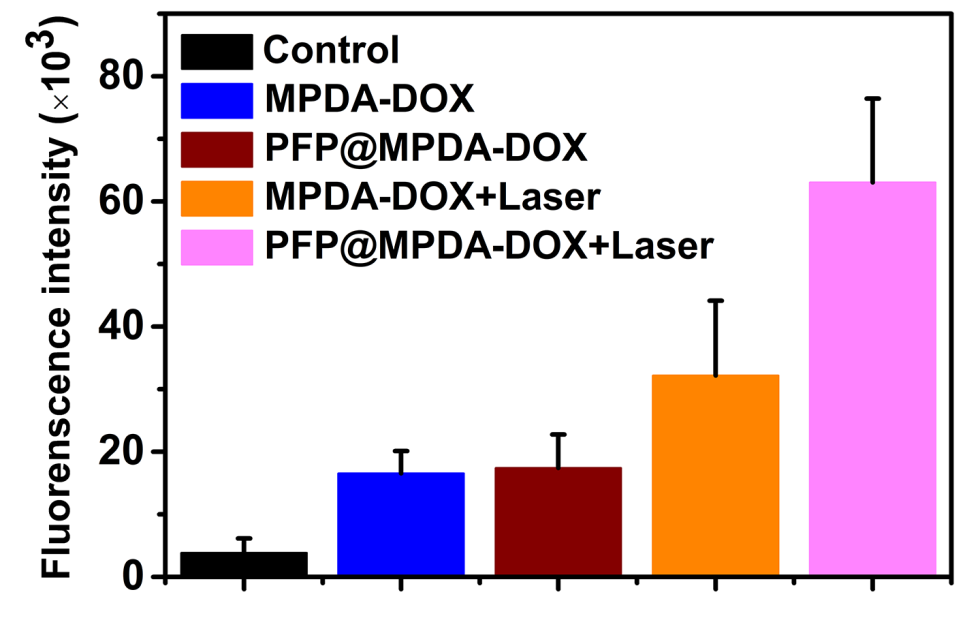
**

**Figure S3.** Corresponding relative mean fluorescence intensity of PC3 cells incubated with MPDA-DOX and PFP@MPDA-DOX without or with NIR laser irradiation.

**
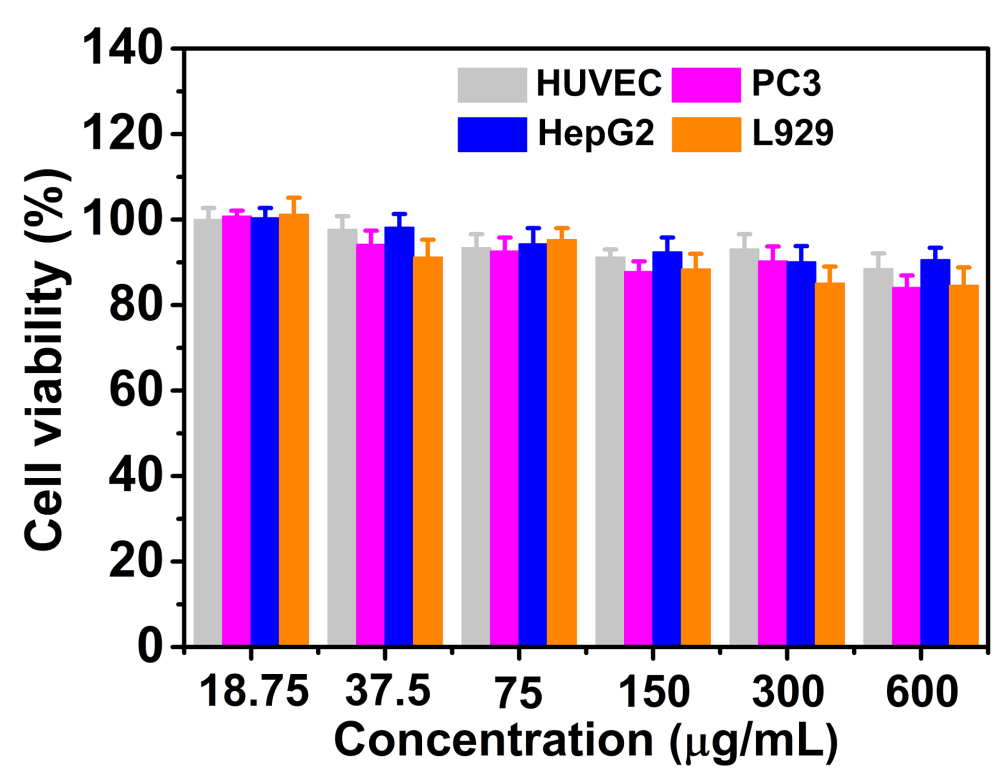
**

**Figure S4.** Cell viabilities of HUVEC, PC3, HepG2, and L929 cells after incubation with various doses of blank MPDA NPs for 24 h. Data are given as the mean ± SD (n = 5).

**
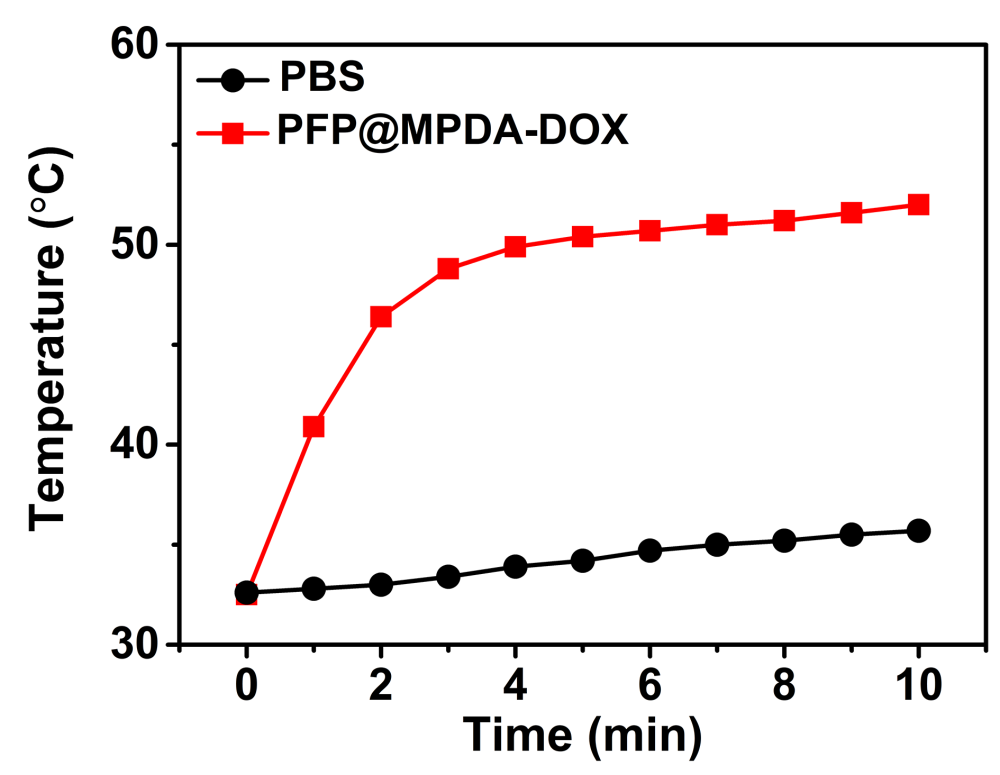
**

**Figure S5.** Temperature recording of tumor site upon 10 min 808 nm laser exposure (1.0 W cm-2) after intravenous injected with PBS and PFP@MPDA-DOX at 12 h.

**
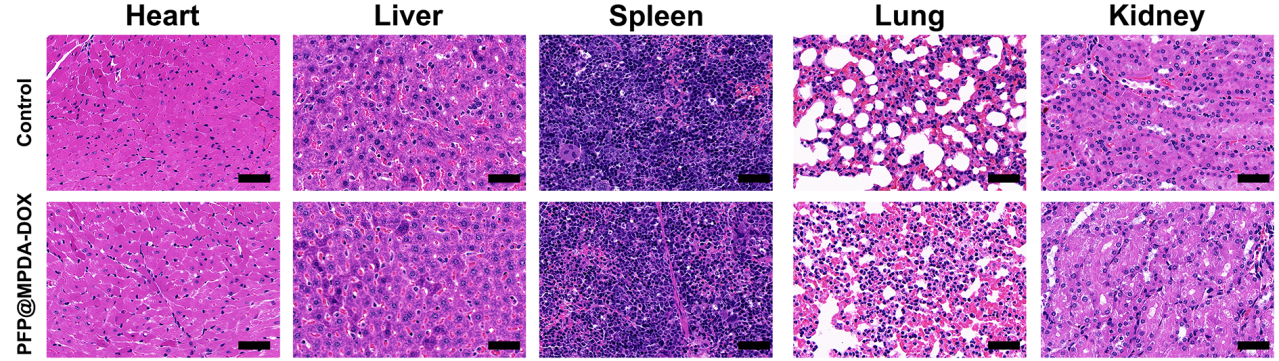
**

**Figure S6.** H&E stained histological images of major organs (heart, liver, spleen, lung, and kidney) from mice treated with PBA and PFP@MPDA-DOX NPs. Scale bar: 50 µm.
